# Supplementary material for: Dietary and environmental factors have opposite AhR-dependent effects on C. elegans healthspan
Source: publisher site journal article supplement (doi:10.18632/aging.202316), 2020-12-13
Supplement: Supplementary file [file aging-v13i1-202316-supplementary-material-SD3.pdf]

## SUPPLEMENTARY TABLES

**Supplementary Table 1. Relative expression of transgenes in control or *ahr-1* RNAi-treated reporter strains.**

| Strain name | Gene            | Rel. expression (mean ± SD)                      | N                                                                  | n      | p-value            |
|-------------|-----------------|--------------------------------------------------|--------------------------------------------------------------------|--------|--------------------|
| BC14926     | <b>cyp-14A3</b> | anterior: 0.97<br>posterior: 1.05                | 38 (con)<br>35 ( <i>ahr-1</i> )                                    | 3      | 0.544<br>0.333     |
| SD1444      | <b>cyp-25A2</b> | 1.07 ± 0.16                                      | 38                                                                 | 2      | 0.067              |
| BC20334     | <b>cyp-29A2</b> | 0.85 ± 0.60                                      | 42                                                                 | 2      | 0.377              |
| cyp-35A2    | <b>cyp-35A2</b> | anterior: 8.43 ± 11.96<br>posterior: 1.99 ± 2.14 | 43 (con)<br>42 ( <i>ahr-1</i> )                                    | 3      | < 0.001<br>0.005   |
| cyp-35A3    | <b>cyp-35A3</b> | 1.08 ± 0.09                                      | 28 (con)<br>26 ( <i>ahr-1</i> )                                    | 2      | 0.02               |
| CY573       | <b>cyp-35B1</b> | anterior: 2.60 ± 1.97<br>posterior: 2.90 ± 2.40  | 36 (con)<br>27 ( <i>ahr-1</i> )<br>55 (con)<br>44 ( <i>ahr-1</i> ) | 2<br>3 | < 0.001<br>< 0.001 |
| BC15044     | <b>cyp-37A1</b> | 0.66 ± 0.14                                      | 46 (con)<br>26 ( <i>ahr-1</i> )                                    | 2      | < 0.001            |
| CL2166      | <b>gst-4</b>    | 1.58 ± 0.37                                      | 27 (con)<br>29 ( <i>ahr-1</i> )                                    | 2      | < 0.001            |
| ugt-29      | <b>ugt-29</b>   | 0.96 ± 0.05                                      | 44 (con)<br>36 ( <i>ahr-1</i> )                                    | 3      | 0.004              |

The relative expression was measured in worms on their first day of adulthood and normalized to control RNAi treated worms in each replicate. N shows the number of worms and n the number of experiments, Statistical test: 2-tailed unpaired t-test.

**Supplementary Table 2. *C. elegans* strains used in this study.**

| Strain name    | Genotype                                                                       | Strain name     | Genotype                                                                |
|----------------|--------------------------------------------------------------------------------|-----------------|-------------------------------------------------------------------------|
| <b>BC14926</b> | <i>dpy-5(e907); sEx14926[rCes K09A11.4::GFP + pCeh361]</i>                     | <b>NV35a *</b>  | <i>ahr-1(ju145); (pAF15)gst-4p::GFP::NLS</i>                            |
| <b>BC15044</b> | <i>dpy-5(e907); sEx15044[rCes F01D5.9::GFP + pCeh361]</i>                      | <b>NV35wt *</b> | <i>pAF15)gst-4p::GFP::NLS</i>                                           |
| <b>BC20306</b> | <i>cyp-34A9p::GFP</i>                                                          | <b>NV38b *</b>  | <i>ahr-1(ju145); unc-54p::Q40::YFP</i>                                  |
| <b>BC20334</b> | <i>cyp-29A2p::GFP</i>                                                          | <b>NV38wt *</b> | <i>unc-54p::Q40::YFP</i>                                                |
| <b>CL2166</b>  | <i>pAF15)gst-4p::GFP::NLS</i>                                                  | <b>NV41a *</b>  | <i>unc-119p::Aβ 1-42; Pmyo-2::YFP; ahr-1(ju145)</i>                     |
| <b>CY573</b>   | <i>cyp-35B1p::GFP + gcy-7p::GFP</i>                                            | <b>NV41wt *</b> | <i>unc-119p::Aβ 1-42; Pmyo-2::YFP</i>                                   |
| <b>cyp35A2</b> | <i>cyp-35A2p::GFP</i>                                                          | <b>NV42a *</b>  | <i>unc-54p::alphasynuclein::YFP, ahr-1(ju145)</i>                       |
| <b>cyp35A3</b> | <i>cyp-35A3p::GFP</i>                                                          | <b>NV42wt *</b> | <i>unc-54p::alphasynuclein::YFP</i>                                     |
| <b>cyp35A5</b> | <i>cyp-35A5p::GFP</i>                                                          | <b>NV47a *</b>  | <i>ugt-29p::GFP; ahr-1(ju145)</i>                                       |
| <b>cyp33E2</b> | <i>cyp-33E2p::GFP</i>                                                          | <b>NV47wt *</b> | <i>ugt-29p::GFP</i>                                                     |
| <b>CZ2485</b>  | <i>ahr-1(ju145)</i>                                                            | <b>SD1444</b>   | <i>unc-119(ed3); galIs237 [cyp-25A2p::his-24::mCherry + unc-119(+)]</i> |
| <b>N2</b>      | <i>wild-type</i>                                                               | <b>TU3311</b>   | <i>uls60[unc119p::YFP; unc119p::sid-1]</i>                              |
| <b>NL2098</b>  | <i>rrf-1(pk1417)</i>                                                           | <b>TU3401</b>   | <i>sid-1(pk3321); uls69[myo-2p::mCherry + unc-119p::sid-1]</i>          |
| <b>NL2550</b>  | <i>ppw-1(pk2505)</i>                                                           | <b>ugt-29</b>   | <i>ugt-29p::GFP</i>                                                     |
| <b>NR222</b>   | <i>rde-1(ne219); kzIs9[lin-26p::nls::GFP + lin-26p::rde-1 + rol-6(su1006)]</i> | <b>VP303</b>    | <i>rde-1(ne300); neIs9 [myo-3::HA::RDE-1 + rol-6(su1006)]</i>           |
| <b>NV33a</b>   | <i>cyp-35B1p::GFP + gcy-7p::GFP; ahr-1(ju145)</i>                              | <b>WM118</b>    | <i>rde-1(ne219); kbls7 [nhx-2p::rde-1 + rol-6(su1006)]</i>              |
| <b>NV33wt</b>  | <i>cyp-35B1p::GFP + gcy-7p::GFP</i>                                            | <b>ZG24</b>     | <i>ahr-1(ia03)</i>                                                      |

Strains are sorted alphabetically.

\* these strains were constructed using classical breeding techniques.

**Supplementary Table 3. Primer pairs used in this study to validate genes differentially expressed between *ahr-1(ju145)* and wild-type (Supplementary Figure 3).**

| Gene     |   | Sequence (5' – 3')        | Annealing temp.<br>(°C) | Efficiency (%) |
|----------|---|---------------------------|-------------------------|----------------|
| clec-209 | F | TGCTCGGGGAACAACCAAAA      | 60                      | 88.4           |
|          | R | TTGGCTACGAACGATTGATGC     |                         |                |
| C01B4.6  | F | TGGCGATGCGAAAATTGATGTAA   | 61                      | 83.9           |
|          | R | ATCTCCAGAAAGTGCTCGGC      |                         |                |
| F56A4.3  | F | ACGAGGGGAATGAATGGCAA      | 67                      | 101.4          |
|          | R | CCATAGGGACCAATATCCATGAACT |                         |                |
| C01B4.7  | F | GTTTTGGAATCAGACGCGGG      | 67                      | 106.6          |
|          | R | CAGTGGGGTTCCGTCAAGTT      |                         |                |
| atf-2    | F | CGAAGGAACAATGAAGCCGC      | 67                      | 98.1           |
|          | R | CCAAGAGCTGAACTCGTCGT      |                         |                |
| K04H4.2  | F | ACGCCGGAATCTGTTGTTCT      | 67                      | 95.3           |
|          | R | CGTTCATTTGGAAAGGAGGCAT    |                         |                |
| egl-46   | F | CACCTCAACCGCTTTTCCAAG     | 67                      | 85.1           |
|          | R | ATTTACATCCGCCTCCTCC       |                         |                |
| T20F5.4  | F | TCATCTACCGAGCAGCCAAC      | 61                      | 94.5           |
|          | R | GAGATGCTCGGTCTCACTGC      |                         |                |
| ptr-4    | F | TCCTACCAGACGCGCAATC       | 66                      | 79.5           |
|          | R | GCAACCCATACTGACGGAGT      |                         |                |
| dyf-7    | F | GTCTGCGTTTCCGTCACAAG      | 66                      | 124.8          |
|          | R | CGGGGAAGCAACAAGTTCTG      |                         |                |
| cdc-42   | F | ATTACGCCGTACAGTAATG       | 62                      | 100.8          |
|          | R | ATCCCTGAGATCGACTTGAG      | 58                      | 107.2          |
| act-1    | F | GCTCTTGCCCCATCAACCAT      | 60                      | 99.7           |
|          | R | CACTTGCGGTGAACGATGGA      | 58                      | 98.1           |
